# Supplementary material for: Synthesis and properties of poly(trifluoroethylene)viaa persistent radical mediated polymerization of trifluoroethylene
Source: Royal Society of Chemistry journal article supplement (doi:10.1039/c7py02018j), 2018-01-01
Supplement: c7py02018j1.pdf [file c7py02018j1.pdf]

**Electronic Supplementary Information**

**Synthesis and Properties of poly(trifluoroethylene) via a persistent radical mediated polymerization of trifluoroethylene**

Maxime Colpaert,<sup>a</sup> Sanjib Banerjee,<sup>\*,a,#</sup> Vincent Ladmiral,<sup>a</sup> Taizo Ono<sup>b</sup> and Bruno Ameduri<sup>\*,a</sup>

<sup>a</sup>Ingénierie et Architectures Macromoléculaires, Institut Charles Gerhardt, UMR 5253 CNRS, UM, ENSCM, Place Eugène Bataillon, 34095 Montpellier Cedex 5, France

<sup>b</sup>National Institute of Advanced Industrial Science and Technology, 2266-98, Anagahora, Shimoshidami, Moriyama, Nagoya, Aichi 463-8560, Japan

<sup>#</sup>Present address: Department of Chemistry, Indian Institute of Technology Bhilai, GEC Campus, Sejbahar, Raipur 492015, Chattisgarh, India

\*E-mail: bruno.ameduri@enscm.fr (B.A.).

\*E-mail: sanjib.banerjee@iitbhilai.ac.in (S.B.).

## Contents:

|                                                                                                                    |     |
|--------------------------------------------------------------------------------------------------------------------|-----|
| Figure S1. Pictures of the Carius tubes containing PTrFE samples and PTrFE films.....                              | S3  |
| Figure S2. Evolution of selected $^{19}\text{F}$ NMR signals of PTrFE.....                                         | S4  |
| Figure S3. $^1\text{H}$ NMR spectrum of $\text{CF}_3\text{-PTrFE-CF}_3$ homopolymer ( <b>P2</b> , Table 1).....    | S5  |
| Figure S4. $^{19}\text{F}$ NMR spectrum of $\text{CF}_3\text{-PTrFE-CF}_3$ homopolymer ( <b>P2</b> , Table 1)..... | S6  |
| Figure S5. $^1\text{H}$ NMR spectrum of $\text{CF}_3\text{-PTrFE-CF}_3$ homopolymer ( <b>P3</b> , Table 1).....    | S7  |
| Figure S6. $^{19}\text{F}$ NMR spectrum of $\text{CF}_3\text{-PTrFE-CF}_3$ homopolymer ( <b>P3</b> , Table 1)..... | S8  |
| Figure S7. $^1\text{H}$ NMR spectrum of $\text{CF}_3\text{-PTrFE-CF}_3$ homopolymer ( <b>P4</b> , Table 1).....    | S9  |
| Figure S8. $^{19}\text{F}$ NMR spectrum of $\text{CF}_3\text{-PTrFE-CF}_3$ homopolymer ( <b>P4</b> , Table 1)..... | S10 |
| Figure S9. ATR-IR spectra PTrFE samples.....                                                                       | S11 |
| Figure S10. Expansion of negative ion MALDI-TOF mass spectrum of PTrFE .....                                       | S12 |

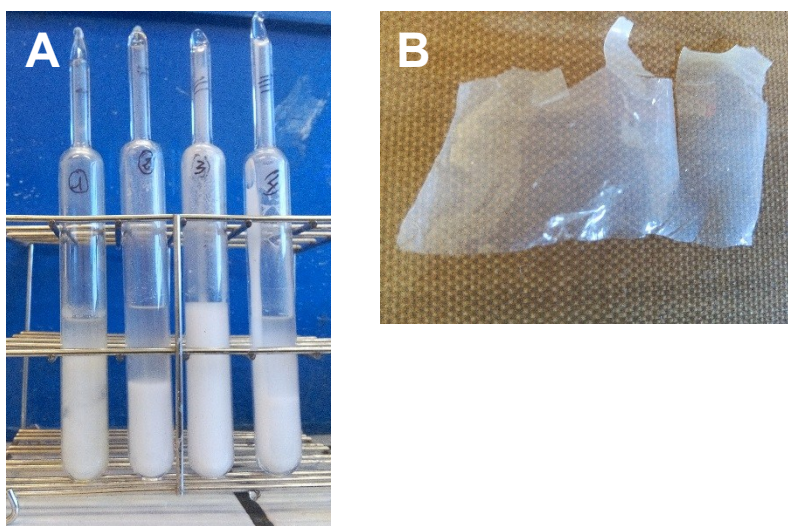

**Fig. S1** A) Pictures of four Carius tubes containing PTrFE samples at the end of the free radical homopolymerization of TrFE initiated by  $\cdot\text{CF}_3$  radical from PPR in 1,1,1,3,3-pentafluorbutane at 83 °C (**P1-P4**, Table 1). B) PTrFE film obtained after purification and casting (**P2**, Table 1)

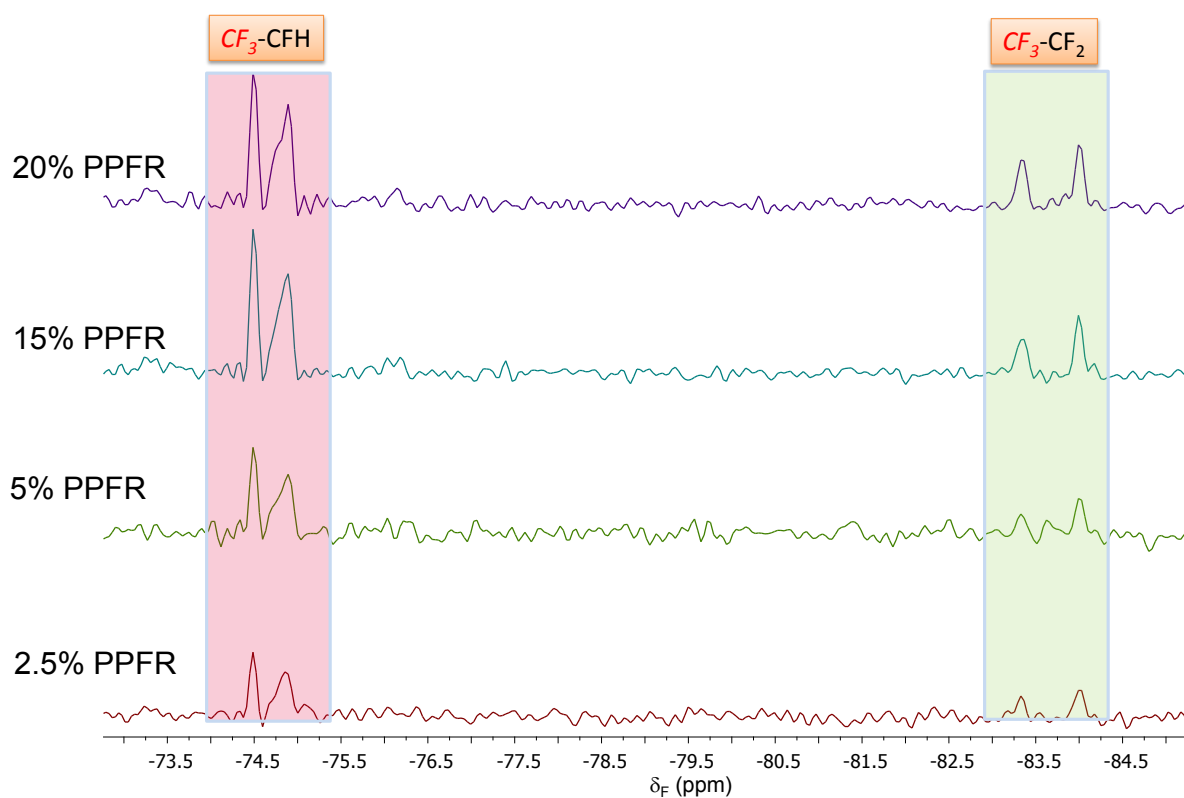

**Fig. S2** Evolution of expansion of -73 to -85 ppm zone in the  $^{19}\text{F}$  NMR spectra of PTrFE prepared by free radical homopolymerization of TrFE initiated by  $\cdot\text{CF}_3$  radical from PPFR in PFB at 83 °C (**P1-P4**, Table 1). The spectra were recorded in acetone- $d_6$ .

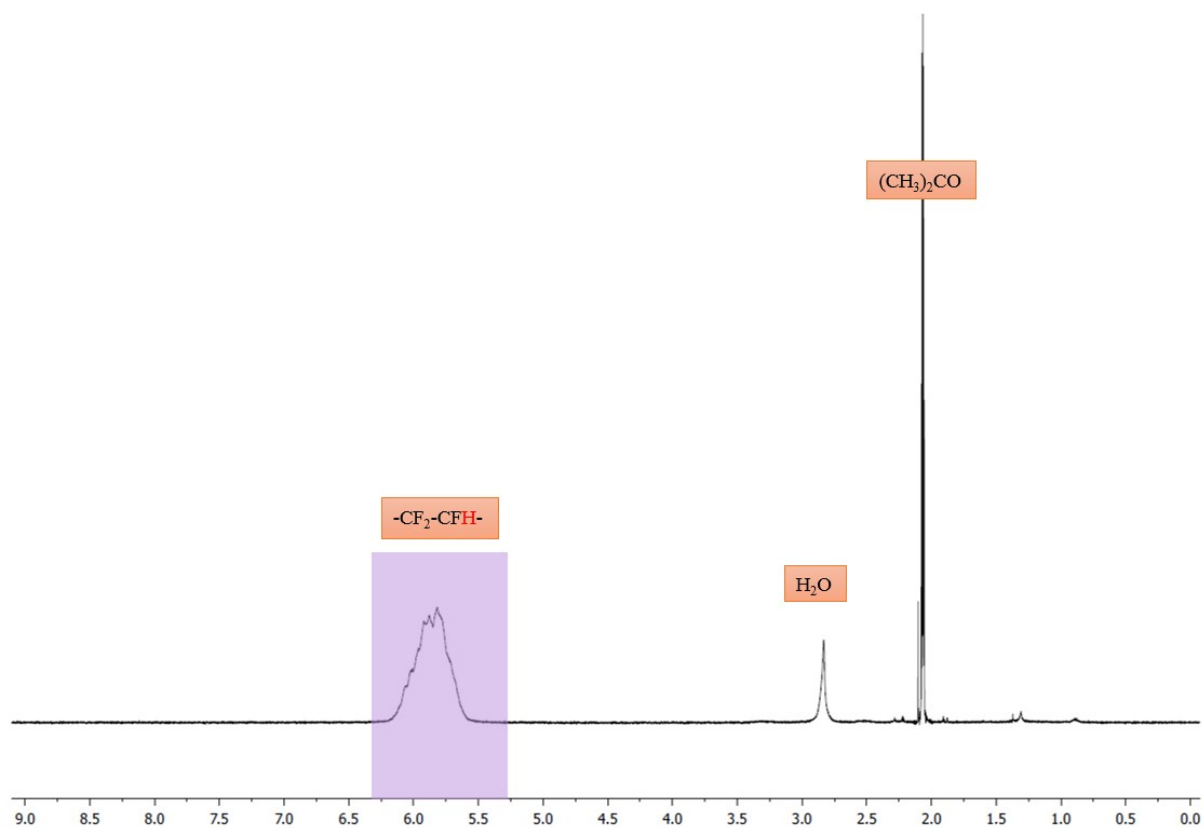

**Fig. S3**  $^1\text{H}$  NMR spectrum of  $\text{CF}_3\text{-PTrFE-CF}_3$  homopolymer prepared by radical polymerization of TrFE initiated by PPFR at  $83\text{ }^\circ\text{C}$  (**P2**, Table 1), recorded in acetone- $d_6$  at  $20\text{ }^\circ\text{C}$ . The signals at 2.05 and 2.84 ppm are assigned to acetone and water, respectively.

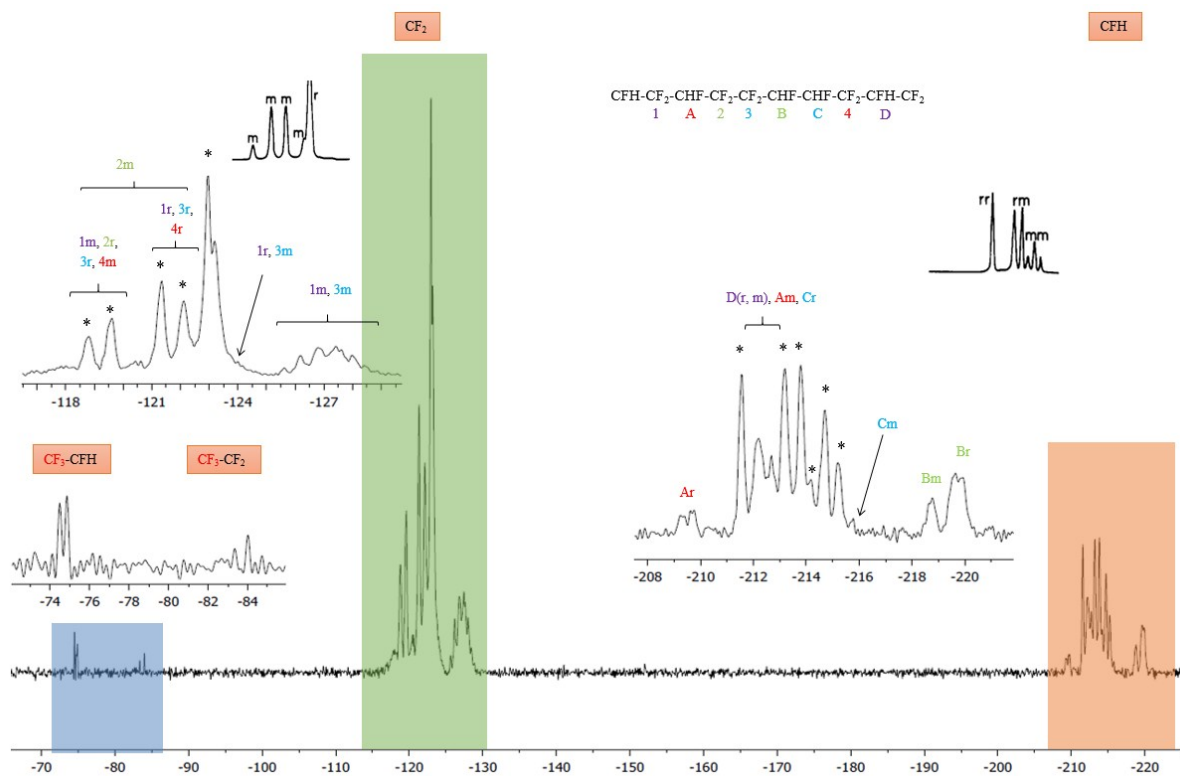

**Fig. S4**  $^{19}\text{F}\{^1\text{H}\}$  NMR spectrum of  $\text{CF}_3\text{-PTrFE-CF}_3$  homopolymer prepared by radical polymerization of TrFE initiated by PPFR at  $83\text{ }^\circ\text{C}$  (**P2**, Table 1), recorded in acetone- $d_6$  at  $20\text{ }^\circ\text{C}$ . The expansion in the  $-118$  to  $-129$  ppm range indicates the AB system from the geminal - $\text{CF}_2$ - fluorines in a meso stereochemical dyad.

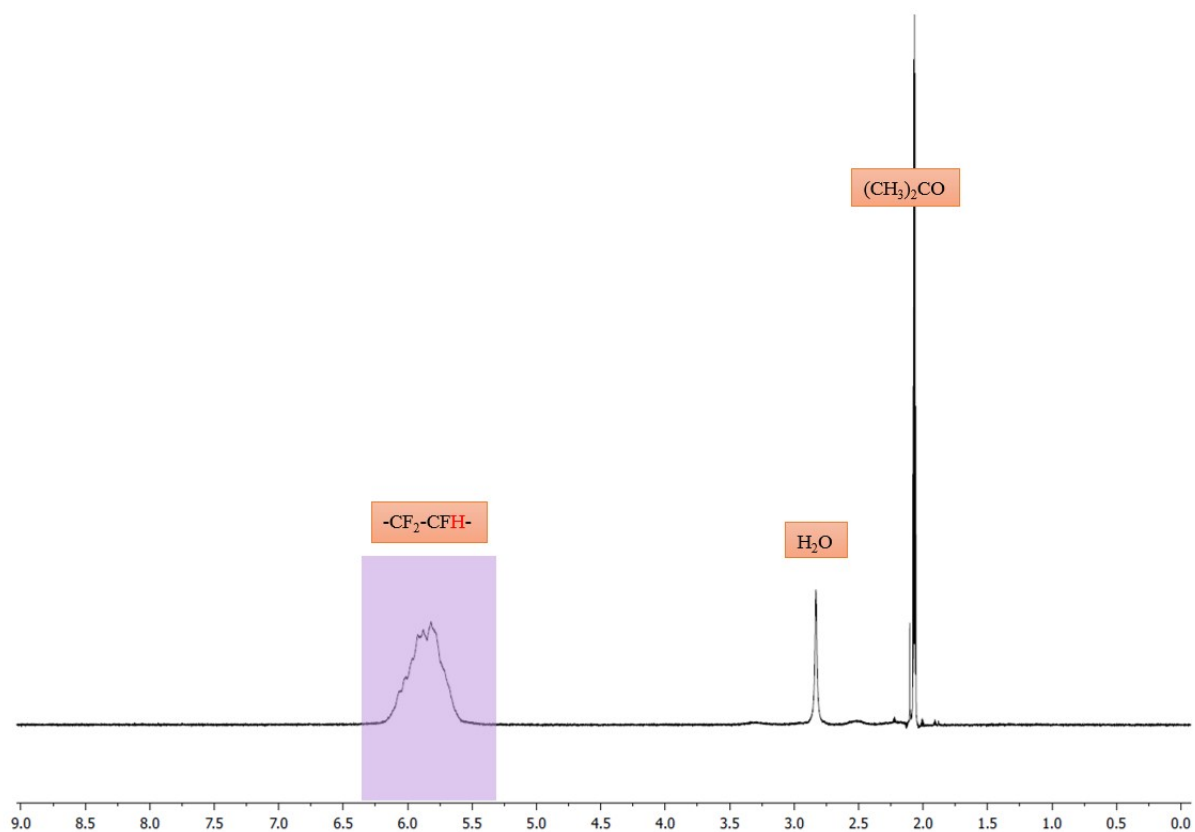

**Fig. S5**  $^1\text{H}$  NMR spectrum of  $\text{CF}_3\text{-PTrFE-CF}_3$  homopolymer prepared by radical polymerization of TrFE initiated by PPFR at  $83\text{ }^\circ\text{C}$  (**P3**, Table 1), recorded in acetone- $d_6$  at  $20\text{ }^\circ\text{C}$ . The signals at 2.05 and 2.84 ppm represent acetone and water, respectively.

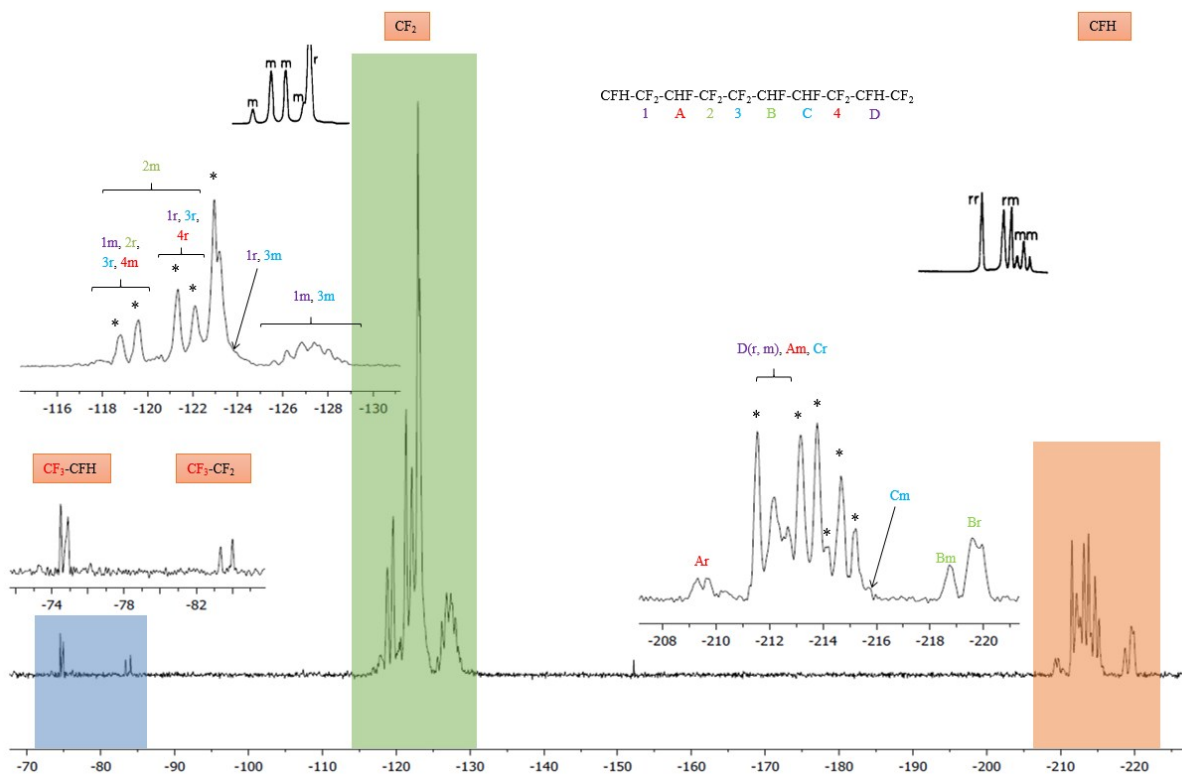

**Fig. S6**  $^{19}\text{F}\{^1\text{H}\}$  NMR spectrum of  $\text{CF}_3\text{-PTrFE-CF}_3$  homopolymer prepared by radical polymerization of TrFE initiated by PPFR at 83 °C (**P3**, Table 1), recorded in acetone- $d_6$  at 20 °C. The expansion in the -118 to -129 ppm range indicates the AB system from the geminal - $\text{CF}_2$ - fluorines in a meso stereochemical dyad.



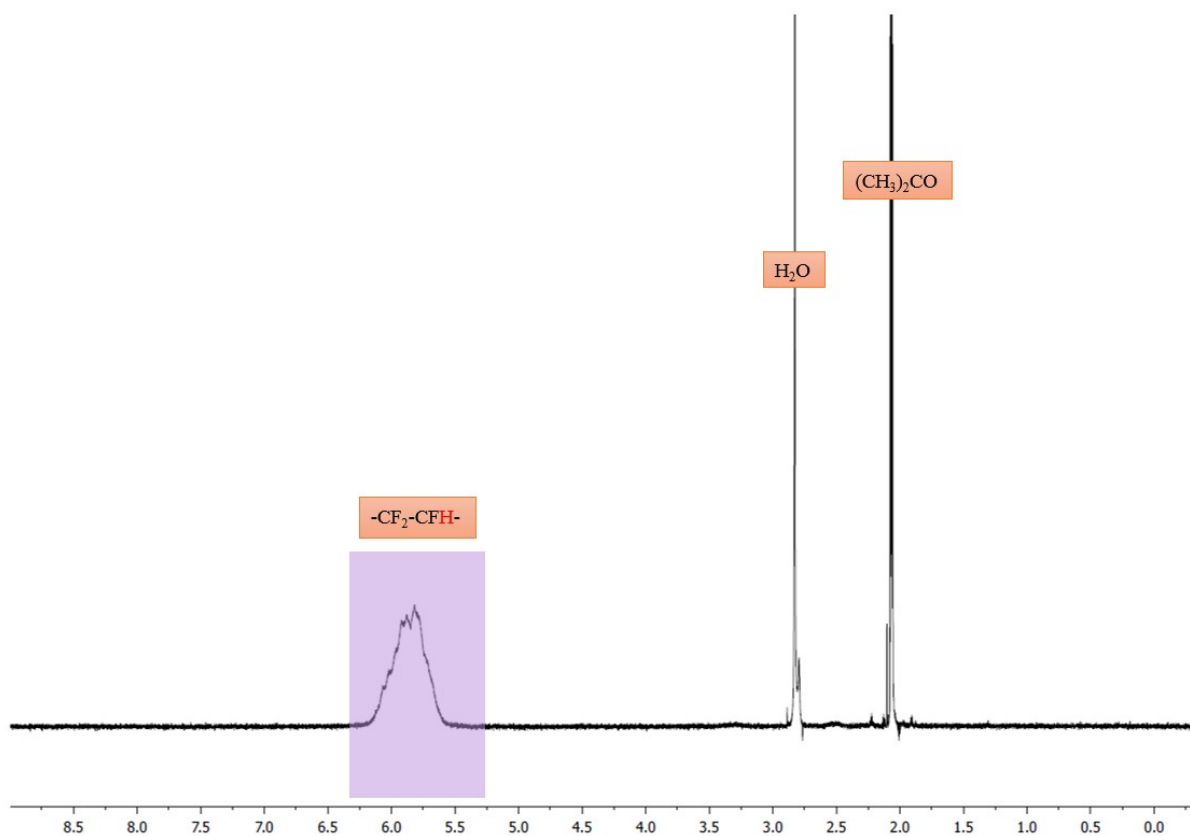

**Fig. S7**  $^1\text{H}$  NMR spectrum of  $\text{CF}_3\text{-PTrFE-CF}_3$  homopolymer prepared by radical polymerization of TrFE initiated by PPFR at  $83\text{ }^\circ\text{C}$  (**P4**, Table 1), recorded in acetone- $d_6$  at  $20\text{ }^\circ\text{C}$ . The signals at 2.05 and 2.84 ppm represent acetone and water, respectively.

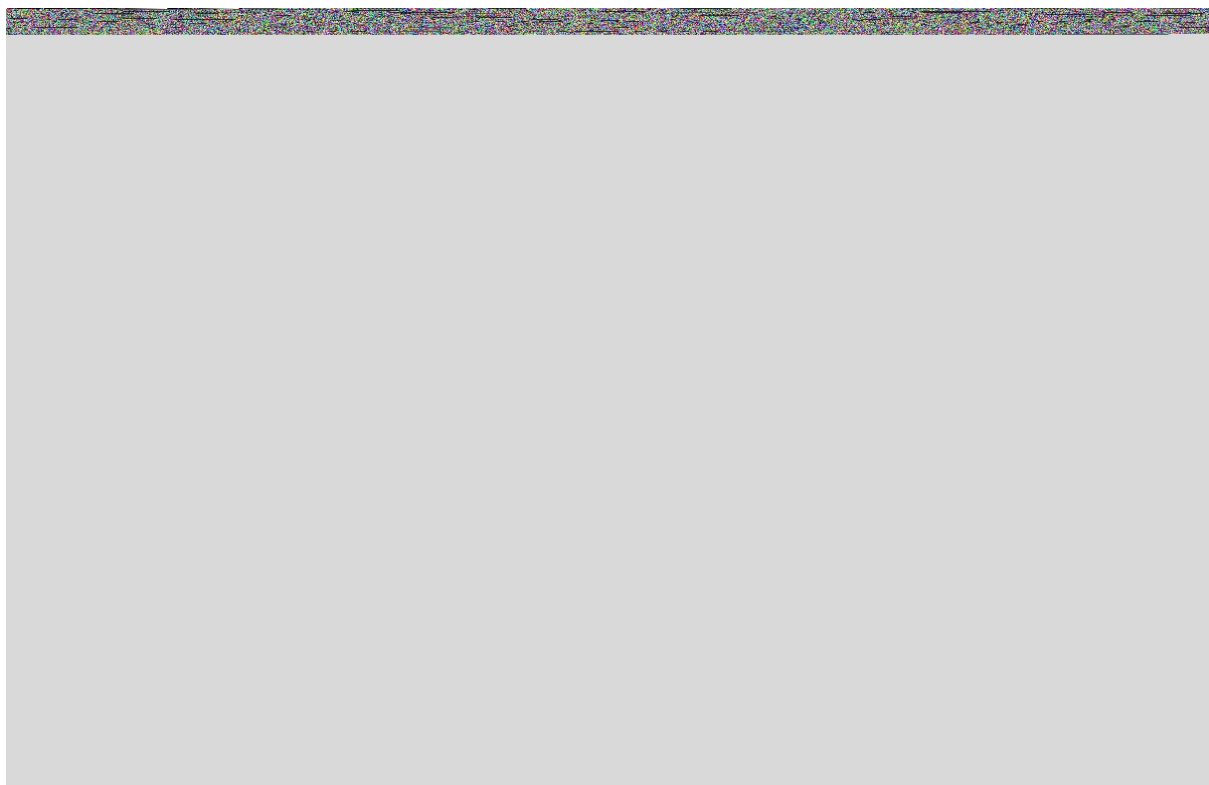

**Fig. S8**  $^{19}\text{F}\{^1\text{H}\}$  NMR spectrum of  $\text{CF}_3\text{-PTrFE-CF}_3$  homopolymer prepared by radical polymerization of TrFE initiated by PPFR at 83 °C (**P4**, Table 1), recorded in acetone- $d_6$  at 20 °C. The expansion in the -118 to -129 ppm range indicates the AB system from the geminal - $\text{CF}_2$ - fluorines in a meso stereochemical dyad.

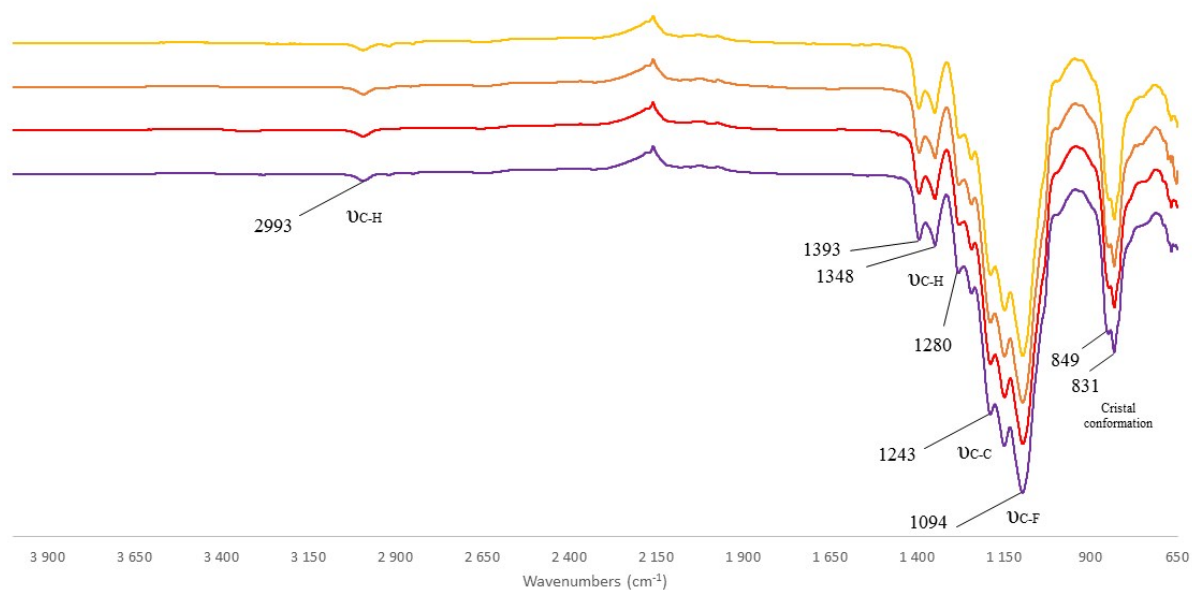

**Fig. S9** ATR-IR spectra of PTrFE prepared by free radical homopolymerization of TrFE initiated by  $\cdot\text{CF}_3$  radical from PPF<sub>6</sub> in PFB at 83 °C (**P1-P4**, Table 1).

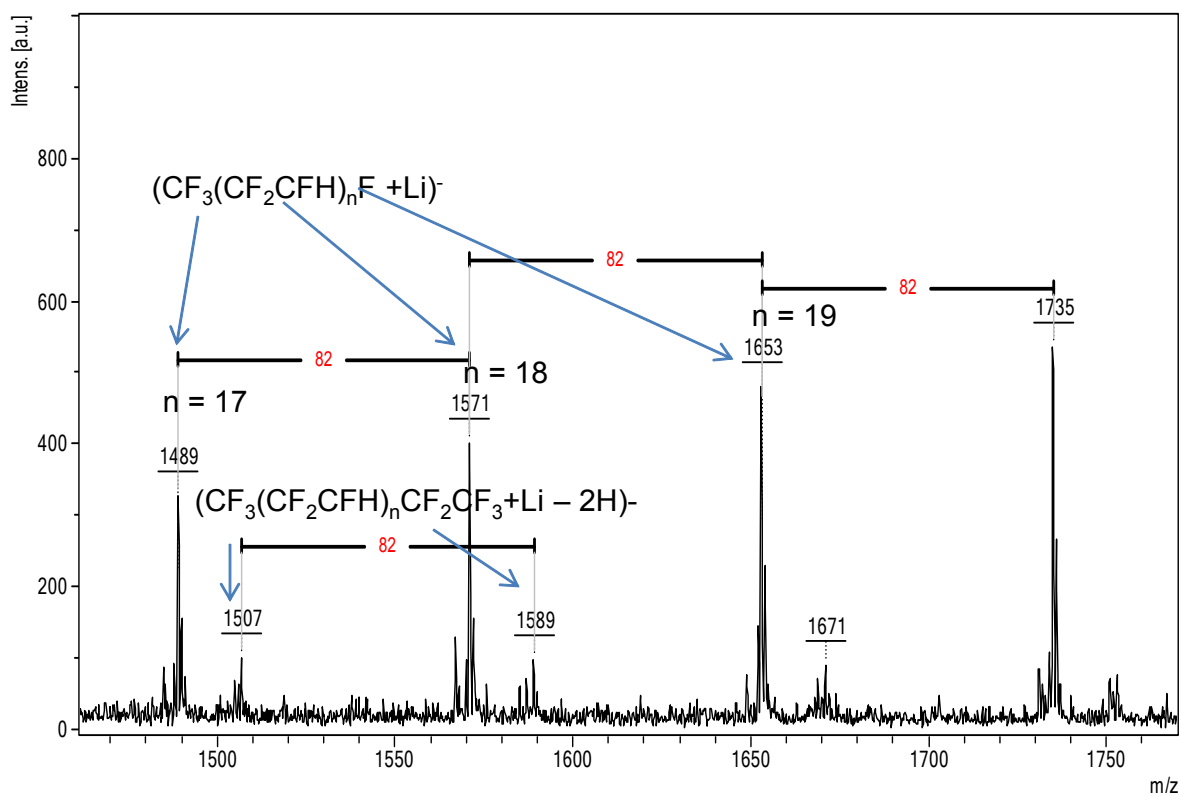

**Fig. S10** Magnification of negative ion MALDI-TOF mass spectrum of PTrFE homopolymer prepared by radical polymerization of TrFE initiated by PPR at 83 °C (**P4**, Table 1), with DCTB as matrix and LiCl as cationic agent.  $2063 = (24 \times 82) + 69 + 19 + 7$  (Li+), the interpeak distance of  $m/z = 82$  corresponds to the mass of the TrFE repeat unit.
